# Supplementary material
Source: HighWire-hosted journal article supplement (https://www.jneurosci.org/highwire/filestream/598490/field_highwire_adjunct_files/4/legends.pdf)
Supplement: legends.pdf [file legends.pdf]

## Supplemental Figure legends

**Figure S1.** Initiation of action potentials during somatic and dendritic current ramp injections in CA1 pyramidal neurons. *(A)*, Simultaneous somatic (black traces) and dendritic ( $\sim 300 \mu\text{m}$  away from the soma; blue traces) voltage responses to somatic current ramp injections. Current ramps were injected either into the soma or into the apical dendrite from a background membrane potential of  $\sim -73 \text{ mV}$ . Overlay of the first somatic and dendritic action potential suggests that the first action potential was initiated at the perisomatic region. *(B)*, Somatic and dendritic voltage responses from the same neuron in *(A)* when a current ramp was injected into the distal dendrite. Again the first action potential was initiated from perisomatic region. Same result was obtained from 4 different neurons and with different current ramp speeds.

**Figure S2.**  $\text{Ca}^{2+}$ -spikes in CA1 pyramidal neuron apical dendrites under hyperexcitable conditions. Simultaneous somatic (black traces) and dendritic (blue) voltage response to somatic injection of depolarizing current pulses from a membrane potential of  $\sim -68\text{mV}$ , under control condition *(A)*, after bath-applying 3 mM 4-aminopyridine (4-AP) *(B)*, and after subsequently bath-applying 1  $\mu\text{M}$  TTX *(C)*. *(D)* The dendritic voltage responses recorded before and after bath-applying 4-AP are shown superimposed. All the records *(A-D)* were obtained from the same cell.

**Figure S3.** Effects of retigabine on somatic action potential bursting in CA1 pyramidal neurons. *(A)*, Perisomatic application of retigabine (20  $\mu\text{M}$ ) enhanced the spike frequency adaptation, but had little effect on the burst of spikes at the beginning of the spike train. *(B)*, Summary diagram showing the effect of perisomatic application of retigabine (20  $\mu\text{M}$ ) on burst frequency. *(C)*, Dendritic local application of retigabine (20  $\mu\text{M}$ ) had no effect of spike frequency adaptation or spike bursting. The panels to the right in *(A)* and *(C)*, show bursts before and after retigabine application on an expanded time scale. *(D)*, Summary diagram showing the effect of dendritic

application of retigabine (20  $\mu\text{M}$ ) on burst frequency. In all of the experiments illustrated in this figure, the slices were incubated with 10  $\mu\text{M}$  DNQX and 2-3 mM 4-AP prior to and during testing. Action potential trains were evoked by injecting 900ms-long depolarizing current pulses into the soma from a membrane potential of  $\sim -68\text{mV}$ .

**Figure S4.** Effects of focally applied XE991 on the somatic and the dendritic  $\text{Ca}^{2+}$ -spikes of CA1 pyramidal neurons. *(A)*, The  $\text{Ca}^{2+}$ -spikes at the very proximal apical dendrite (24  $\mu\text{m}$  from the soma) of a neuron before (black) and after (red) focal application of XE991 (20  $\mu\text{M}$ ) near the recording site. *(B)*, The  $\text{Ca}^{2+}$ -spikes recorded from the distal apical dendrite (313  $\mu\text{m}$  from the soma) of a neuron before (black) and after (red) focal application of XE991 (20  $\mu\text{M}$ ) near the recording site. *(C)*, The effect of XE991 on  $\text{Ca}^{2+}$ -spikes was plotted against the distance of the recording sites from the soma. The ***XE991 effect*** was calculated as % increase in the entire area of the depolarizing response during the current pulse (including the  $\text{Ca}^{2+}$ -spikes), after focal application of XE991, compared to the area before the application of XE991 (=100%). The data points were fitted with a mono-exponential curve (exponential decay constant = 56  $\mu\text{m}$ ).
